# Supplementary material for: The Influence of Flower Head Order and Gibberellic Acid Treatment on the Hydroxycinnamic Acid and Luteolin Derivatives Content in Globe Artichoke Cultivars
Source: MDPI journal article supplement (doi:10.3390/foods10081813), 2021-08-05
Supplement: s1 [file s1]

# **The influence of flower head orders and gibberellic acid treatment on the hydroxycinnamic acid and luteolin derivatives content in globe artichoke cultivars**

**María J. Giménez<sup>1</sup>, Marina Giménez-Berenguer<sup>1</sup>, María E. García-Pastor<sup>1</sup>, Joaquín Parra<sup>2</sup>, Pedro J. Zapata<sup>1</sup> and Salvador Castillo<sup>1,\*</sup>**

<sup>1</sup> Department of Food Technology, EPSO, University Miguel Hernández, Ctra. Beniel km. 3.2, 03312 Orihuela, Alicante, Spain; maria.gimenezt@umh.es (M.J.G.); marina.gimenez02@goumh.umh.es (M.G.-B.); m.garciap@umh.es (M.E.G.-P.); pedrojzapata@umh.es (P.J.Z.)

<sup>2</sup> Elche Agricultural Experimental Station (EEA/STT), CV-855, Ctra. Dolores km. 1, 03290 Elche, Alicante, Spain; parra\_joa@gva.es (J.P.)

\* Correspondence: scastillo@umh.es; Tel.: +34-966-749-733

## **Supplementary Material**

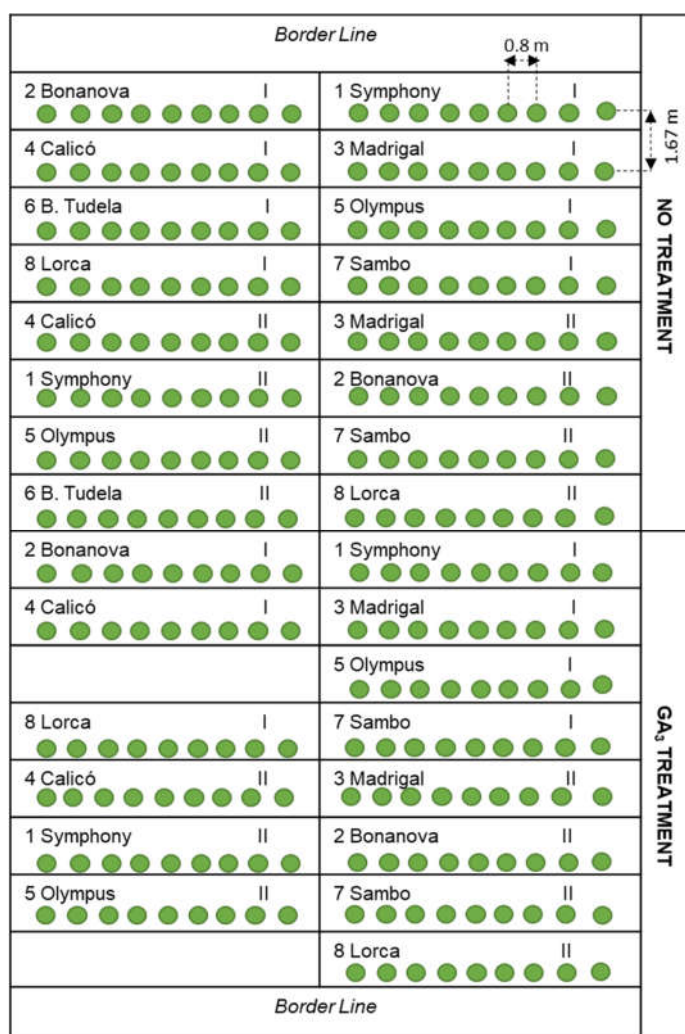

**Figure S1.** Plot experimental design of the two assayed blocks (block I and II) for untreated artichokes (no treatment) and artichokes treated with gibberellic acid (GA<sub>3</sub>) in the eight cultivars.

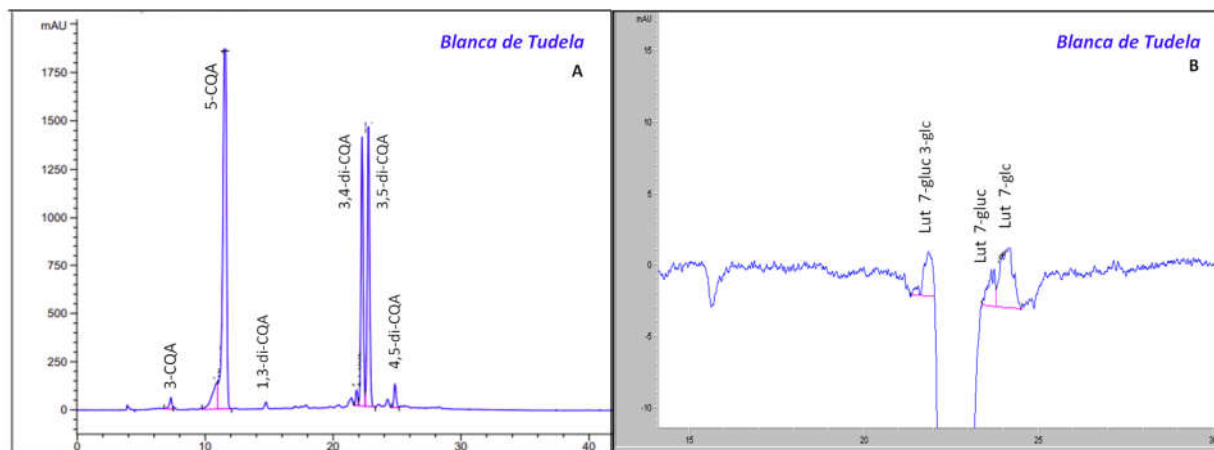

**Figure S2.** HPLC-DA-ESI/MS<sup>n</sup> chromatogram at 320 nm for the 'Blanca de Tudela' cultivar (A). The hydroxycinnamic acids identified: 3-CQA (3-*O*-caffeoylquinic acid;  $t_r \approx 7.3$  min); 5-CQA (5-*O*-caffeoylquinic acid;  $t_r \approx 11.5$  min); 1,3-diCQA (1,3-di-*O*-caffeoylquinic acid;  $t_r \approx 14.7$  min); 3,4-diCQA (3,4-di-*O*-caffeoylquinic acid;  $t_r \approx 22.2$  min); 3,5-diCQA (3,5-di-*O*-caffeoylquinic acid;  $t_r \approx 22.7$  min); and 4,5-diCQA (4,5-di-*O*-caffeoylquinic acid;  $t_r \approx 24.8$  min). RP-HPLC-DAD chromatogram at 360 nm for the 'Blanca de Tudela' cultivar (B). Luteolin derivatives identified: luteolin 7-*O*-glucuronide 3-*O*-glucoside (Lut 7-gluc 3-glc;  $t_r \approx 21.9$  min); luteolin 7-*O*-glucuronide (Lut 7-gluc;  $t_r \approx 23.5$  min); and luteolin 7-*O*-glucoside (Lut 7-glc;  $t_r \approx 23.8$  min).

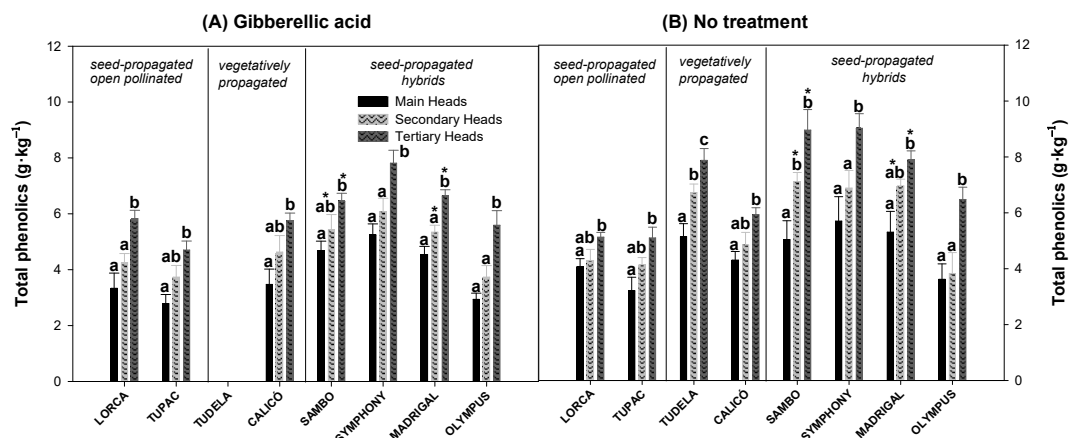

**Figure S3.** Total phenolic content (g·kg<sup>-1</sup>) of globe artichoke cultivars influenced by flower head order (main, secondary and tertiary heads) and treatment [gibberellic acid (A) or no treatment (B)]. Data are the mean  $\pm$  SE. Different letters show significant differences ( $p < 0.05$  according to HSD Duncan's test) among flower head orders for each artichoke cultivar and treatment. Significant differences between both treatments ( $p < 0.05$  according to Student's t-test) were expressed as \* placed in each flower head order for each artichoke cultivar.

**Table S1.** Heatmap's supplementary data of minor hydroxycinnamic acid content (Figure 5): 3-*O*-caffeoylquinnic acid (3-CQA), 1,3-di-*O*-caffeoylquinnic acid (1,3-diCQA) and 4,5-di-*O*-caffeoylquinnic acid (4,5-diCQA) content ( $\text{mg}\cdot\text{kg}^{-1}$ ) of globe artichoke cultivars influenced by flower head order (main, secondary and tertiary heads represented in the heatmap with the numbers 1, 2 and 3) and treatment (gibberellic acid or no treatment).

|                                       |          | Gibberellic acid |                 |                | No treatment  |                 |                |
|---------------------------------------|----------|------------------|-----------------|----------------|---------------|-----------------|----------------|
|                                       |          | Main heads       | Secondary heads | Tertiary heads | Main heads    | Secondary heads | Tertiary heads |
| 3- <i>O</i> -caffeoylquinnic acid     | LORCA    | 206.9 ± 18.3a    | 292.4 ± 10.8b*  | 303.4 ± 16.7b  | 179.7 ± 4.9a  | 223.1 ± 0.3b*   | 242.3 ± 21.2b  |
|                                       | TUPAC    | 119.9 ± 10.8a*   | 222.1 ± 18.0b*  | 301.8 ± 19.7c* | 157.2 ± 7.9a* | 168.4 ± 8.7a*   | 183.4 ± 12.5a* |
|                                       | TUDELA   | -                | -               | -              | 23.9 ± 1.3a   | 29.2 ± 1.5b     | 45.5 ± 4.2c    |
|                                       | CALICÓ   | 84.4 ± 6.5a      | 89.7 ± 7.7a     | 113.7 ± 10.5a  | 89.7 ± 7.7a   | 106.2 ± 4.8ab   | 132.0 ± 12.5b  |
|                                       | SAMBO    | 57.5 ± 5.0a      | 57.9 ± 4.2a*    | 67.0 ± 5.2a*   | 67.9 ± 4.7a   | 95.9 ± 5.0b*    | 96.0 ± 8.5b*   |
|                                       | SYMPHONY | 151.1 ± 6.1a*    | 175.3 ± 10.1ab* | 222.2 ± 19.1b* | 90.1 ± 7.1a*  | 117.0 ± 6.8b*   | 134.7 ± 7.3b*  |
|                                       | MADRIGAL | 86.4 ± 7.2a      | 116.5 ± 9.3b    | 126.2 ± 6.8b*  | 65.0 ± 4.5a   | 93.5 ± 7.6b     | 96.9 ± 6.4b*   |
|                                       | OLYMPUS  | 120.3 ± 8.3a*    | 179.5 ± 11.0b   | 232.6 ± 19.6b  | 154.9 ± 1.6a* | 178.0 ± 8.7b    | 219.9 ± 7.6c   |
| 1,3- <i>O</i> -dicaffeoylquinnic acid | LORCA    | 2.3 ± 0.2a*      | 2.4 ± 0.2a*     | 14.4 ± 0.8b*   | 14.9 ± 0.7a*  | 22.4 ± 1.9b*    | 28.5 ± 1.9b*   |
|                                       | TUPAC    | 2.6 ± 0.2a*      | 4.8 ± 0.4b*     | 4.9 ± 0.4b*    | 16.4 ± 0.9a*  | 18.3 ± 1.1a*    | 37.3 ± 2.2b*   |
|                                       | TUDELA   | -                | -               | -              | 23.1 ± 0.7a   | 27.7 ± 1.4b     | 29.0 ± 1.1b    |
|                                       | CALICÓ   | 18.9 ± 1.6a*     | 21.4 ± 1.1a     | 23.5 ± 1.8a    | 21.4 ± 1.1a*  | 25.8 ± 1.7b     | 27.7 ± 1.5b    |
|                                       | SAMBO    | 4.7 ± 0.3a*      | 7.4 ± 0.2b*     | 12.1 ± 1.0c*   | 44.8 ± 4.1a*  | 47.4 ± 1.7a*    | 52.3 ± 4.7a*   |
|                                       | SYMPHONY | 5.6 ± 0.3a*      | 7.3 ± 0.5b*     | 9.2 ± 0.8b*    | 25.3 ± 1.8a*  | 48.7 ± 4.5b*    | 46.7 ± 3.4b*   |
|                                       | MADRIGAL | 6.1 ± 0.4a*      | 9.5 ± 0.8b*     | 11.4 ± 1.0b*   | 47.0 ± 3.4a*  | 47.8 ± 3.3a*    | 70.3 ± 5.5b*   |

|                                      |          |              |               |                |                |                |                |
|--------------------------------------|----------|--------------|---------------|----------------|----------------|----------------|----------------|
| 4,5- <i>O</i> -dicaffeoylquinic acid | OLYMPUS  | 4.5 ± 0.4a*  | 4.5 ± 0.3a*   | 5.0 ± 0.5a*    | 22.5 ± 0.19a*  | 25.1 ± 1.9ab*  | 30.1 ± 1.0b*   |
|                                      | LORCA    | 40.7 ± 2.6a  | 42.2 ± 2.8a   | 59.0 ± 4.4b    | 33.5 ± 2.2a    | 46.4 ± 2.7b    | 54.0 ± 6.3b    |
|                                      | TUPAC    | 57.6 ± 3.2a* | 47.9 ± 2.2a*  | 33.9 ± 1.6b*   | 28.8 ± 1.8a*   | 38.0 ± 2.7b*   | 50.0 ± 3.3c*   |
|                                      | TUDELA   | -            | -             | -              | 70.4 ± 5.8a    | 89.1 ± 3.8b    | 95.9 ± 6.9c    |
|                                      | CALICÓ   | 62.0 ± 3.6a* | 63.8 ± 4.0a*  | 68.7 ± 2.8a*   | 100.0 ± 3.6a*  | 108.7 ± 3.6a*  | 214.2 ± 16.2b* |
|                                      | SAMBO    | 79.3 ± 7.6a  | 89.1 ± 2.5a   | 92.9 ± 4.7a*   | 83.7 ± 4.1a    | 95.4 ± 3.0a    | 191.4 ± 22.3b* |
|                                      | SYMPHONY | 85.6 ± 2.5a  | 90.9 ± 8.5a   | 104.9 ± 9.5a*  | 84.9 ± 5.7a    | 86.3 ± 6.9a    | 225.5 ± 10.6b* |
|                                      | MADRIGAL | 95.3 ± 2.6a* | 103.3 ± 9.1a* | 150.4 ± 10.3b* | 138.6 ± 12.4a* | 155.9 ± 12.8a* | 314.5 ± 7.8b*  |
|                                      | OLYMPUS  | 37.4 ± 2.6a  | 73.8 ± 1.7b*  | 128.3 ± 11.2c* | 39.8 ± 2.3a    | 51.0 ± 2.4b*   | 52.3 ± 2.9b*   |

<sup>1</sup> Different letters, within the same row, show significant differences ( $p < 0.05$  according to HSD Duncan's test) among flower head orders for each artichoke cultivar and treatment. Significant differences between both treatments ( $p < 0.05$  according to Student's t-test) were expressed as \* placed in each flower head order for each artichoke cultivar.
